# Supplementary material
Source: PubMed Central journal article supplement (PMC3115387)

## Supplemental Materials

### Structural Characterization of the Mitomycin 7-O-Methyltransferase MmcR

Shanteri Singh<sup>1</sup>, Aram Chang<sup>2</sup>, Randal D. Goff<sup>1</sup>, Craig A. Bingman<sup>2</sup>, Sabine Grünschow<sup>3</sup>, David H. Sherman<sup>3</sup>, George N. Phillips Jr.<sup>2\*</sup>, and Jon S. Thorson<sup>1\*</sup>

#### Reaction scheme and NMR spectra of MMA

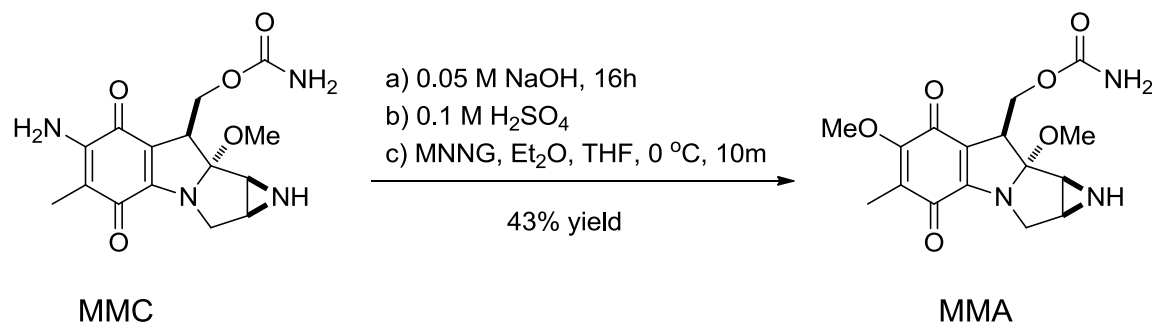

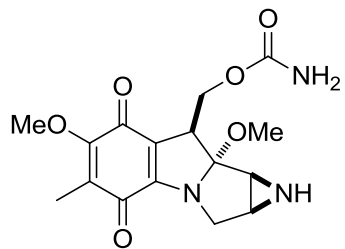

MMA acetone-*d*<sub>6</sub> 500 MHz

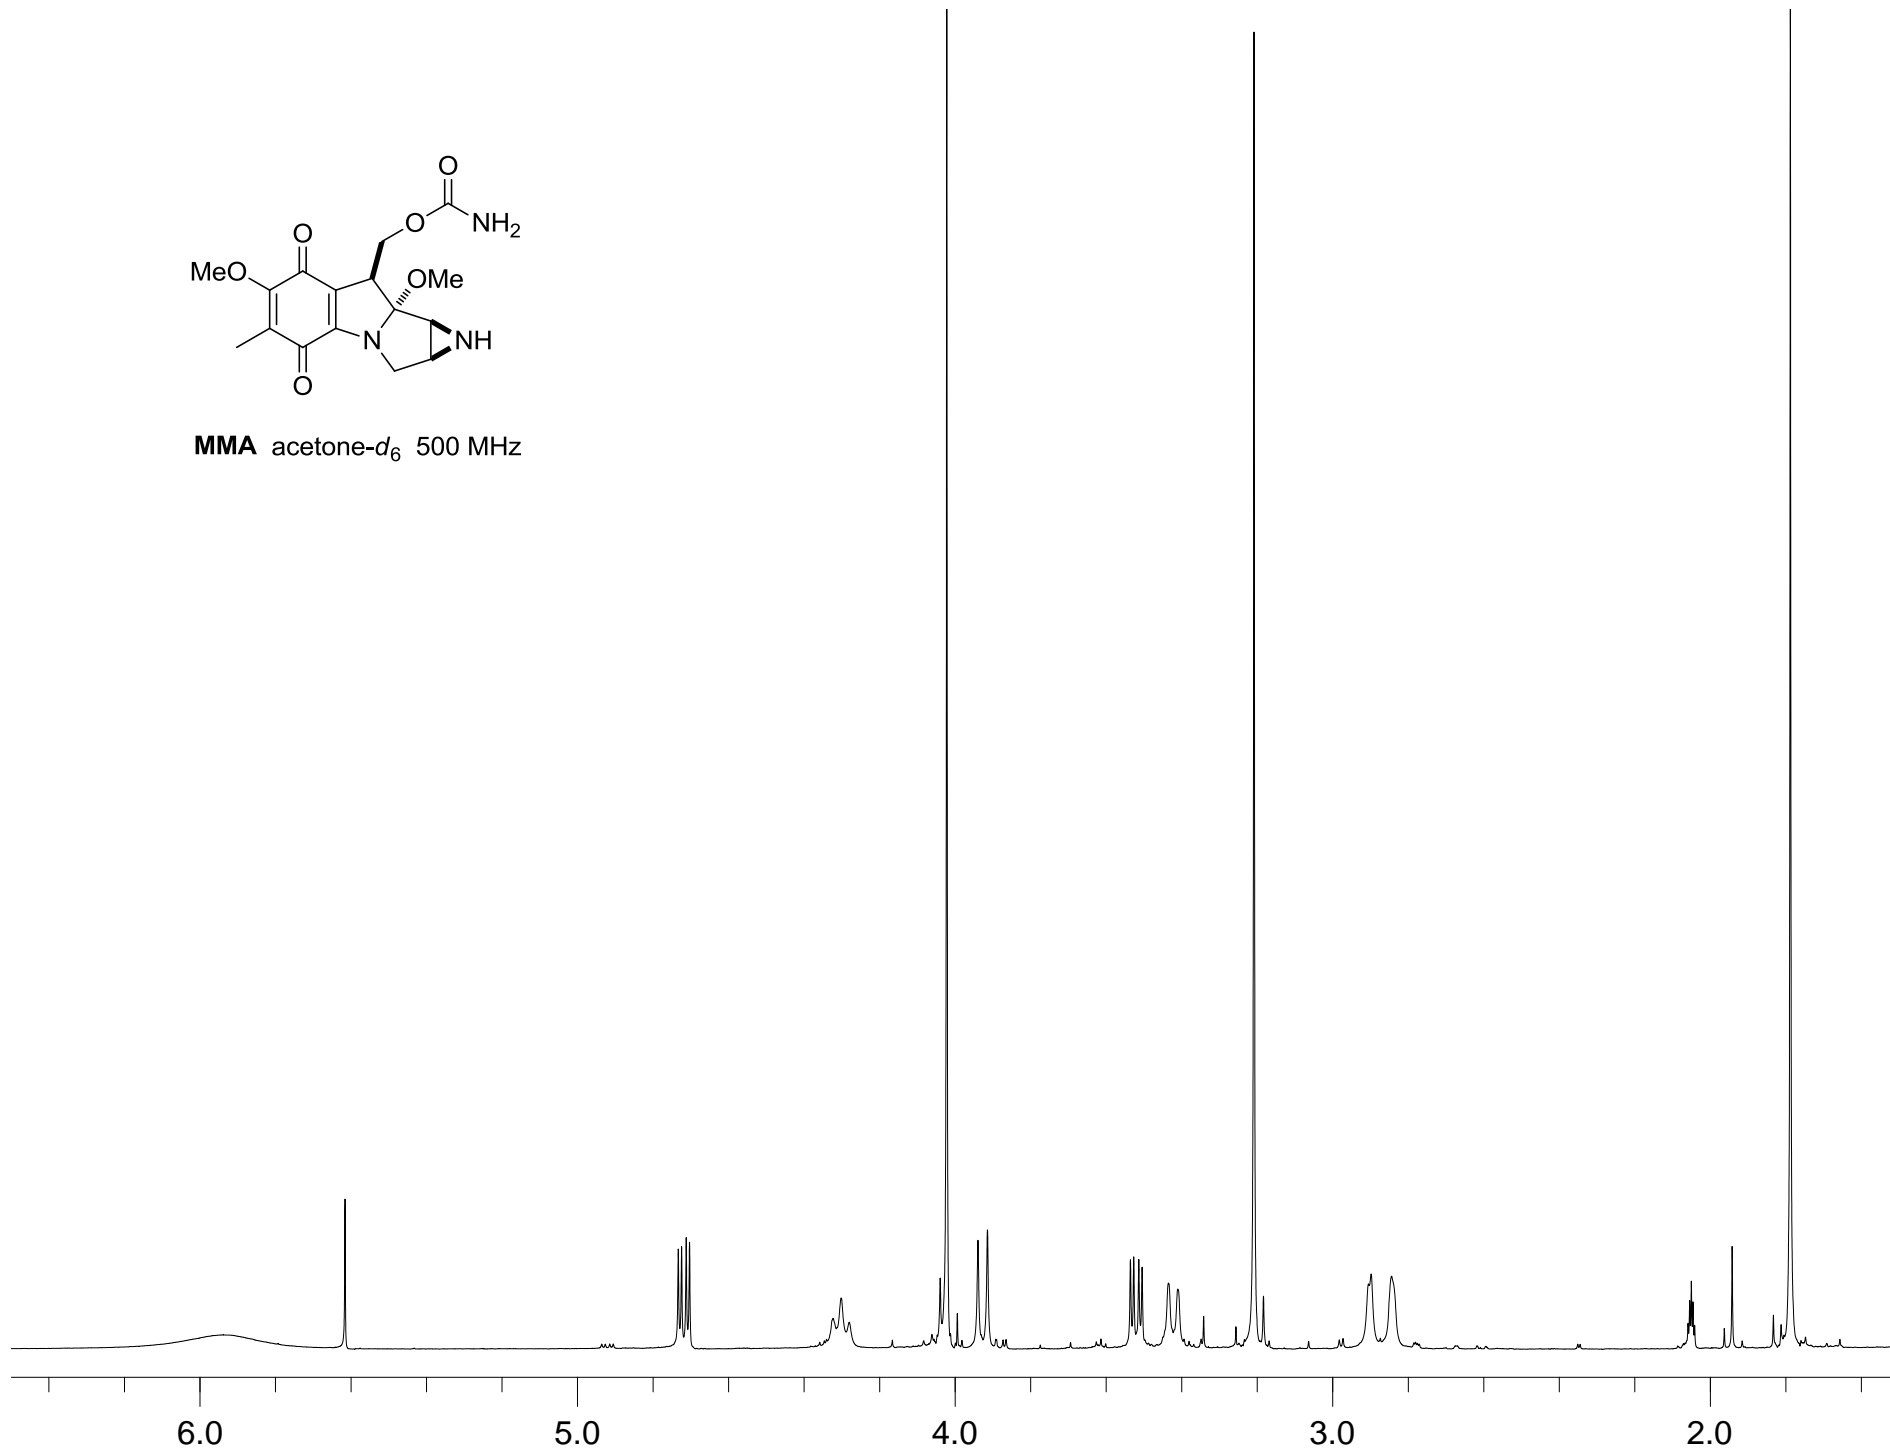

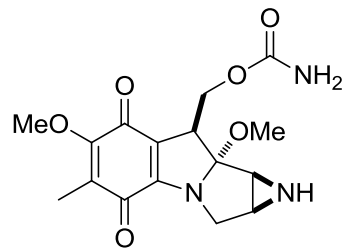

MMA acetone-*d*<sub>6</sub> 125 MHz

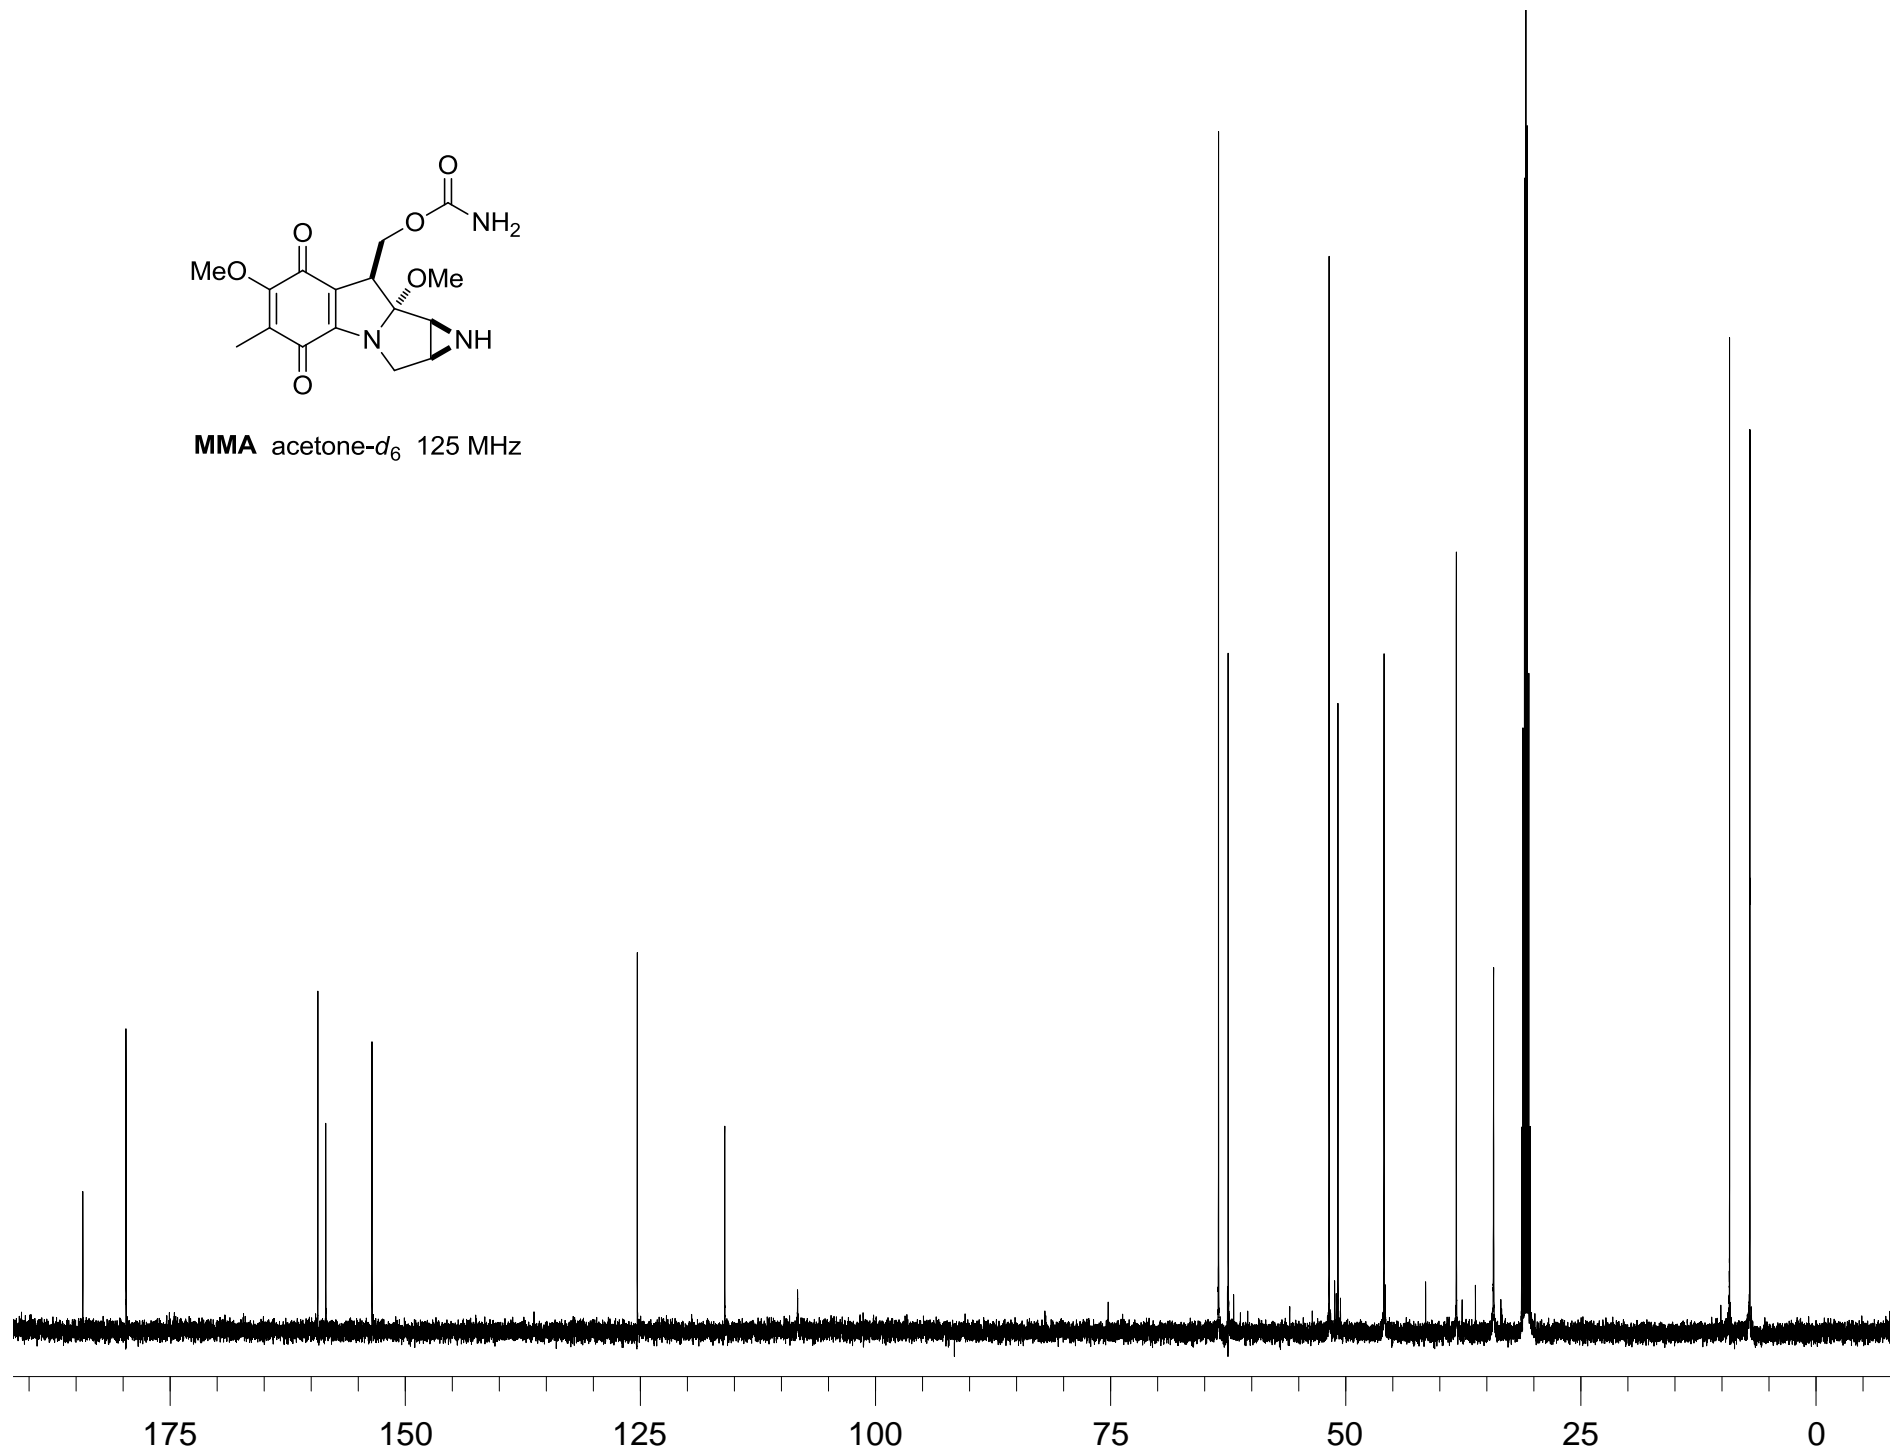

Supplement: NIHMS282159-supplement-supplemental.pdf [file NIHMS282159-supplement-supplemental.pdf]
